# Supplementary material for: Competitiveness during Dual-Species Biofilm Formation of Fusarium oxysporum and Candida albicans and a Novel Treatment Strategy
Source: MDPI journal article supplement (doi:10.3390/pharmaceutics14061167), 2022-05-30
Supplement: s1 [file s1]

Table S1 Name, acronym, and sequences of used primer for RT-qPCR.

| Protein names                         | Gene names        | Primer name                      | Sequence (5'→3')       |
|---------------------------------------|-------------------|----------------------------------|------------------------|
|                                       |                   |                                  |                        |
| <i>Agglutinin like-sequence 3</i>     | <i>ALS3</i>       | <i>C. albicans_ALS3_F</i>        | CTAATGCTGCTACGTATAATT  |
|                                       |                   | <i>C. albicans_ALS3_R</i>        | CCTGAAATTGACATGTAGCA   |
| <i>Ergosterol byosynthesis enzyme</i> | <i>ERG11</i>      | <i>C. albicans_ERG11_F</i>       | ATTGTTGAAACTGTCATTG    |
|                                       |                   | <i>C. albicans_ERG11_R</i>       | CCCCTAATAATATACTGATCTG |
| <i>Actin</i>                          | <i>actin</i>      | <i>C. albicans_ACT1_F</i>        | AGCCCAATCCAAAAGAGGTATT |
|                                       |                   | <i>C. albicans_ACT1_R</i>        | GCTTCGGTCAACAAAACCTGG  |
| <i>Velvet complex subunit A</i>       | <i>VeA</i>        | <i>F. oxysporum_VeA_F</i>        | TTTCCCGACCTTTCTGTCCG   |
|                                       |                   | <i>F. oxysporum_VeA_R</i>        | CGTTTCCACCACTGTTGCTG   |
| <i>Velvet complex subunit B</i>       | <i>VelB</i>       | <i>F. oxysporum_VelB_F</i>       | CCCACCACCAGTCTCAACTC   |
|                                       |                   | <i>F. oxysporum_VelB_R</i>       | TTGCCCATATCCAGACTCGC   |
| <i>Actin-like protein arp-6</i>       | <i>FOYG_02810</i> | <i>F. oxysporum_FOYG_09220_F</i> | GGCCGACTCTACACCATCTCG  |
|                                       |                   | <i>F. oxysporum_FOYG_09220_R</i> | TTTGCTTGCGACTGTCGTTG   |
